# Supplementary material for: cRNAsp12 Web Server for the Prediction of Circular RNA Secondary Structures and Stabilities
Source: MDPI journal article supplement (doi:10.3390/ijms24043822), 2023-02-14
Supplement: s1 [file s1]

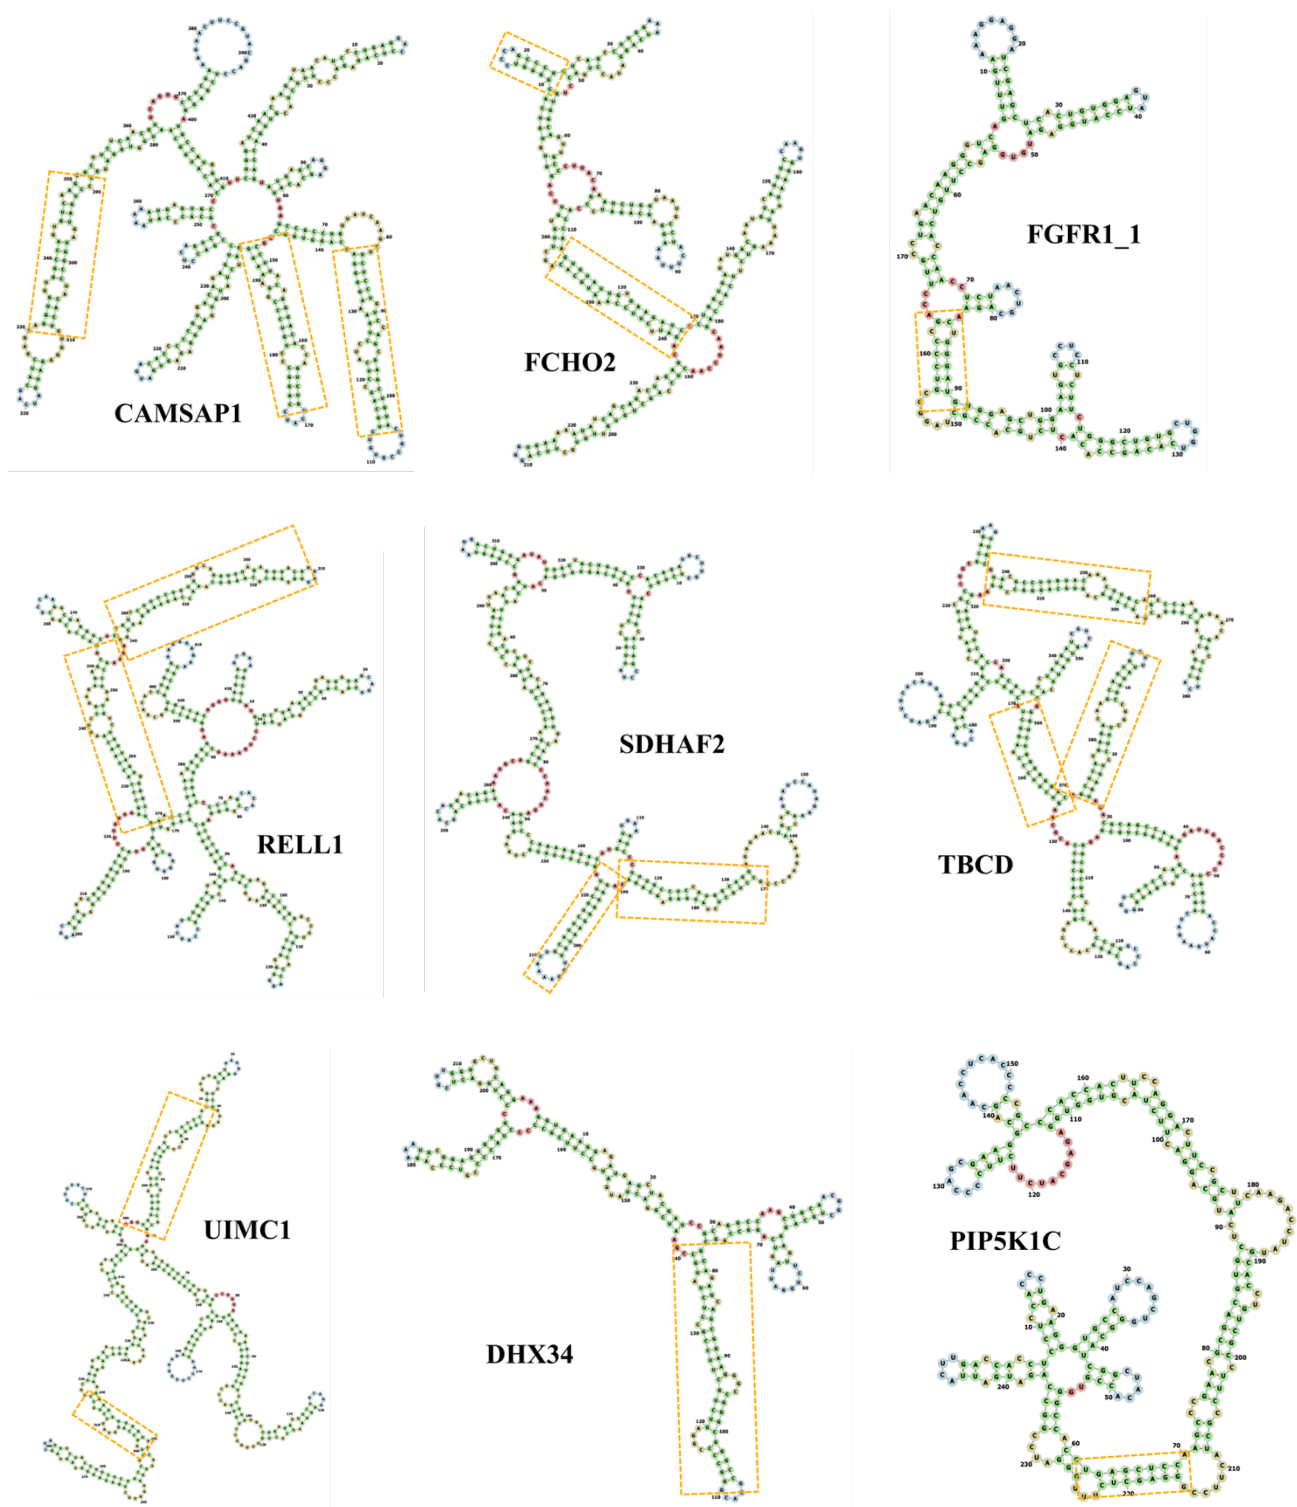

**Figure S1.** cRNAsp12 predictions with the 16-26 bp dsRNAs highlighted by the dashed rectangles.

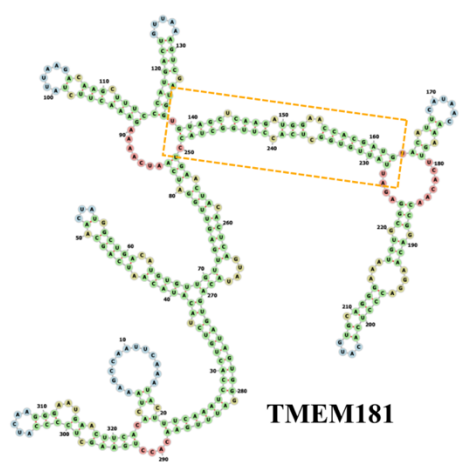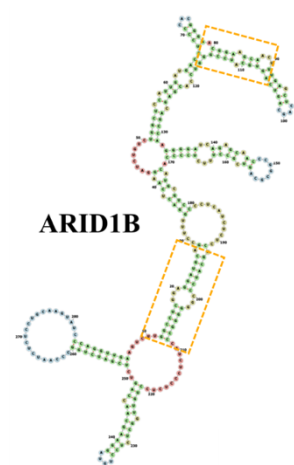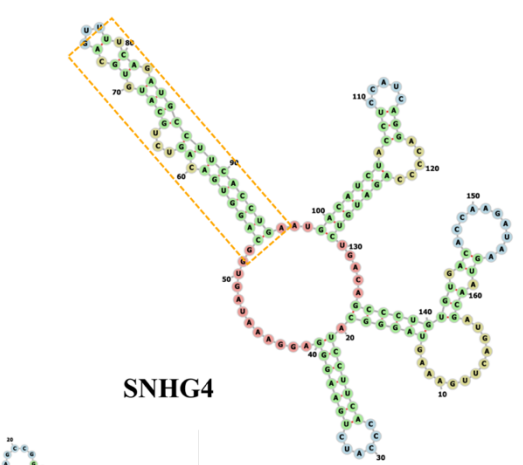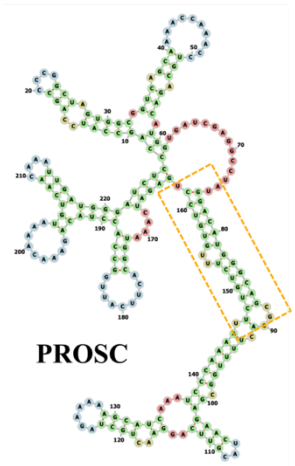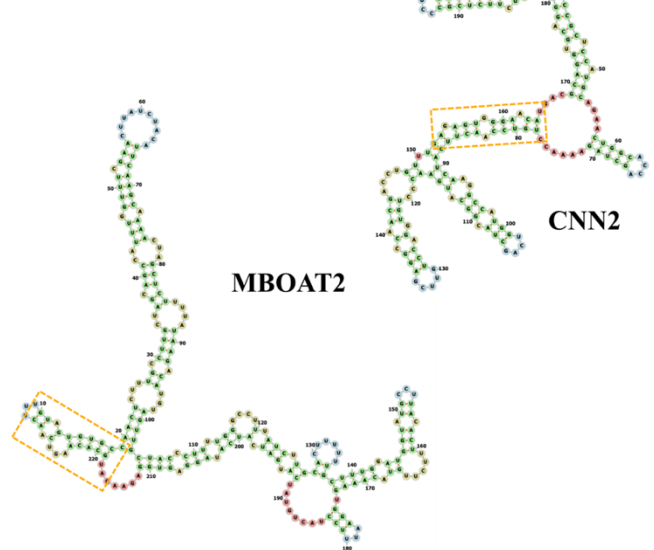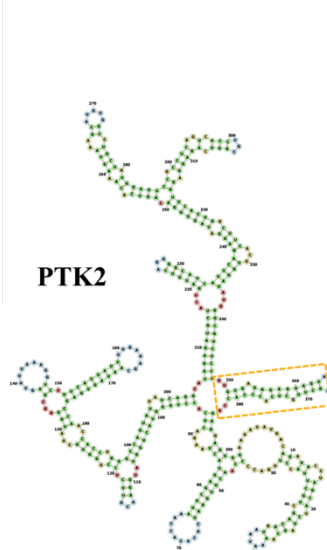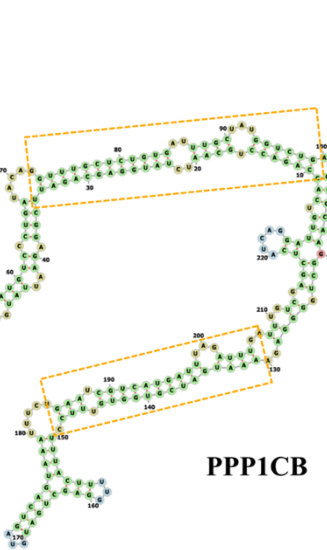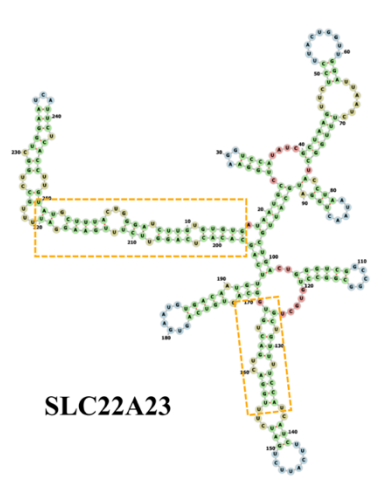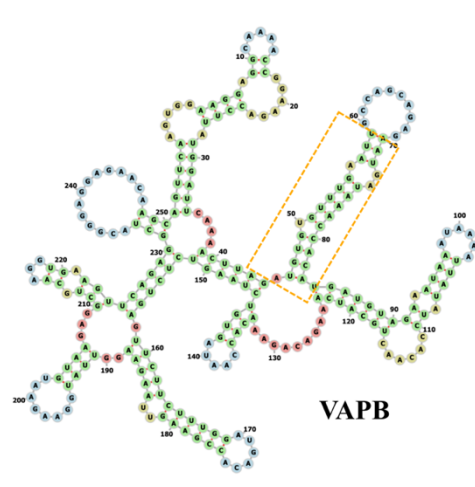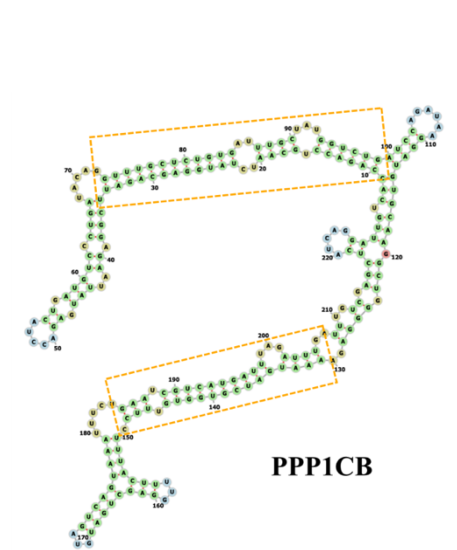

**Figure S1. Continued.**

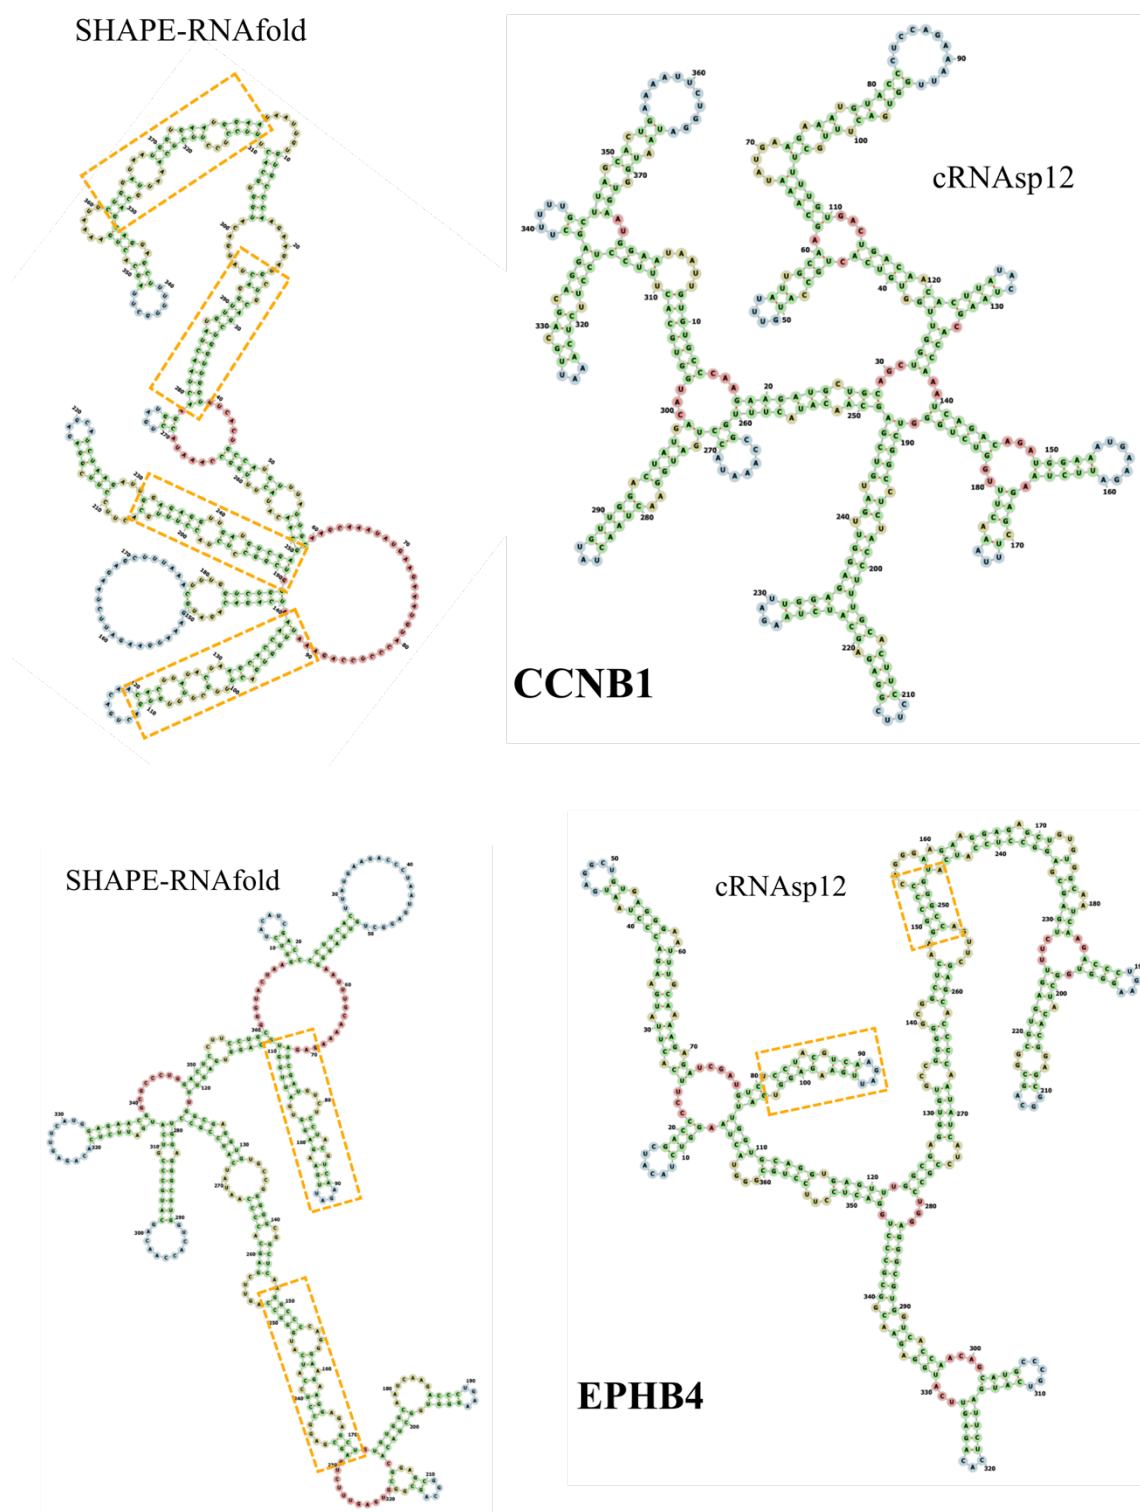

**Figure S2.** SHAPE-RNAfold and cRNAsp12 predictions with the 16-26 bp dsRNAs highlighted by the dashed rectangles.

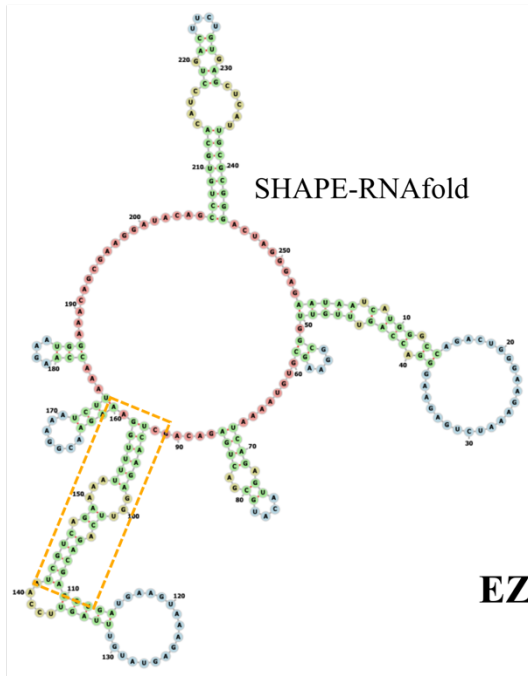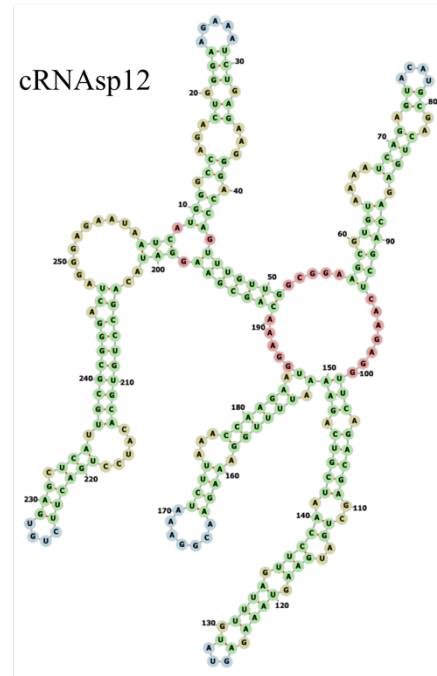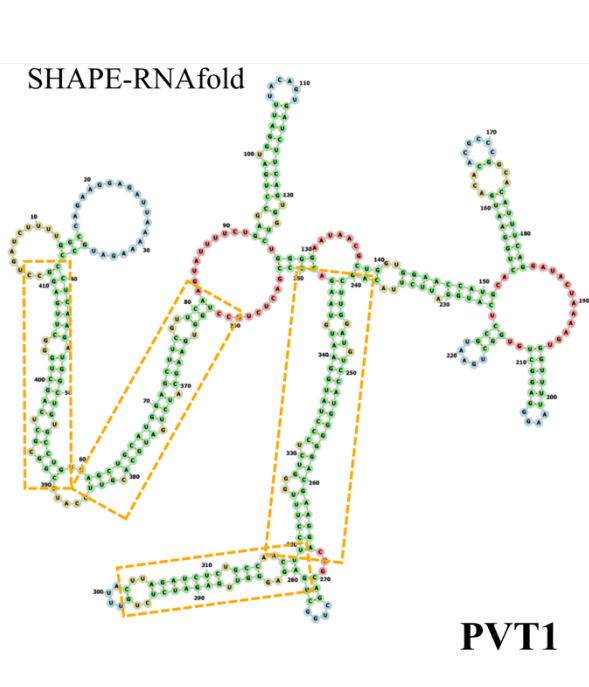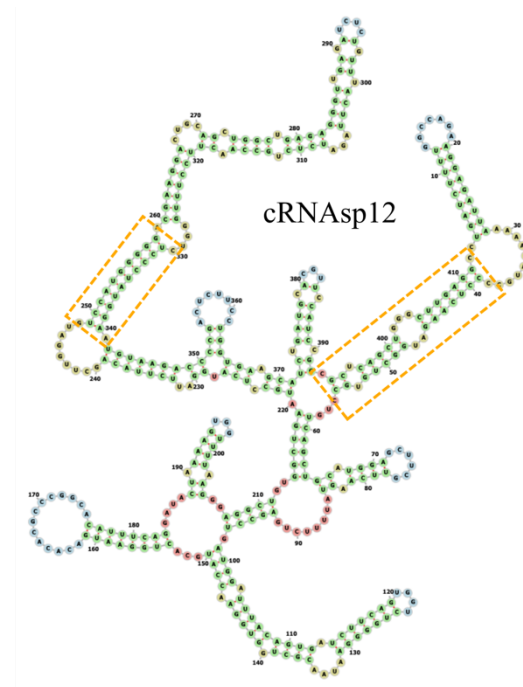

**Figure S2.** Continued.

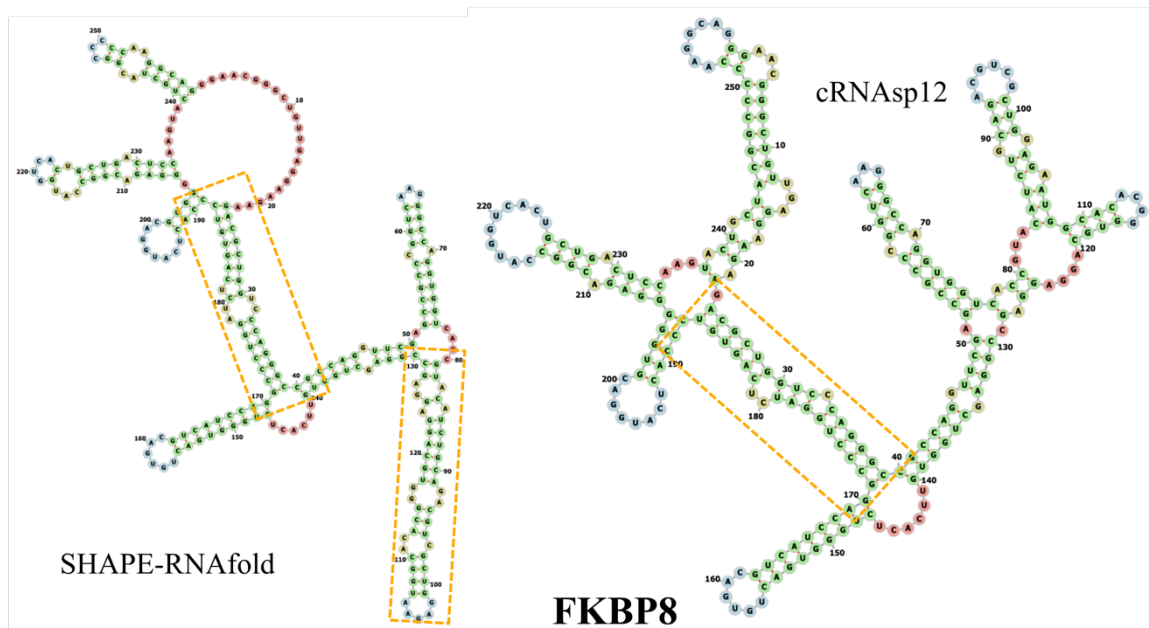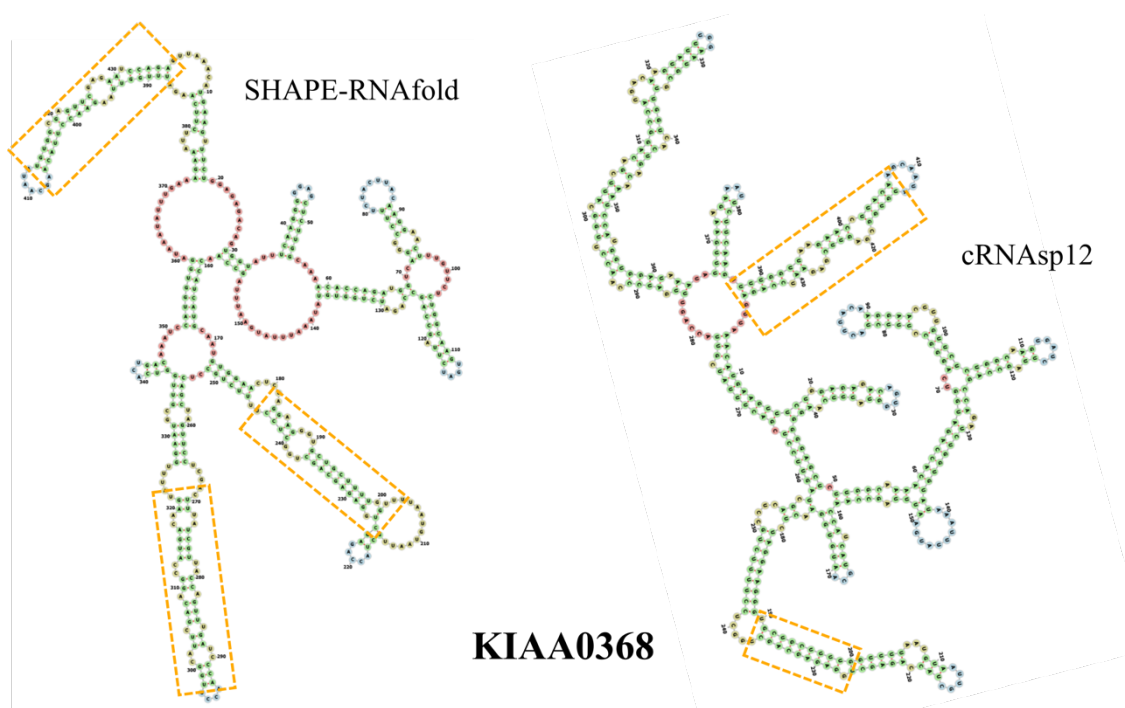

**Figure S2. Continued.**
